# Supplementary material
Source: PubMed Central journal article supplement (PMC9746302)
Supplement: aem.01389-22-s0001.pdf [file aem.01389-22-s0001.pdf]

**Supplementary material for**

**Characterization of multiple alginate lyases in a highly efficient alginate-degrading *Vibrio* strain and its degradation strategy**

Xinxin He<sup>1,3†</sup>, Yunhui Zhang<sup>1,3†</sup>, Xiaolei Wang<sup>1</sup>, Xiaoyu Zhu<sup>1,3</sup>, Leiran Chen<sup>1</sup>, Weizhi Liu<sup>1</sup>, Qianqian Lyu<sup>1</sup>, Lingman Ran<sup>1,3</sup>, Haojin Cheng<sup>1,3</sup> and Xiao-Hua Zhang<sup>1,2,3\*</sup>

<sup>1</sup>Frontiers Science Center for Deep Ocean Multispheres and Earth System & College of Marine Life Sciences, Ocean University of China, Qingdao 266003, China

<sup>2</sup>Laboratory for Marine Ecology and Environmental Science, Qingdao National Laboratory for Marine Science and Technology, Qingdao 266071, China

<sup>3</sup>Institute of Evolution & Marine Biodiversity, Ocean University of China, Qingdao 266003, China

† These authors contributed equally to this work

**\* Author for correspondence:**

Xiao-Hua Zhang, College of Marine Life Sciences, Ocean University of China, 5 Yushan Road, Qingdao 266003, China, Tel: +86-532-82032721, Email: xhzhang@ouc.edu.cn

**Running title: Alginate degradation in a *Vibrio* strain**

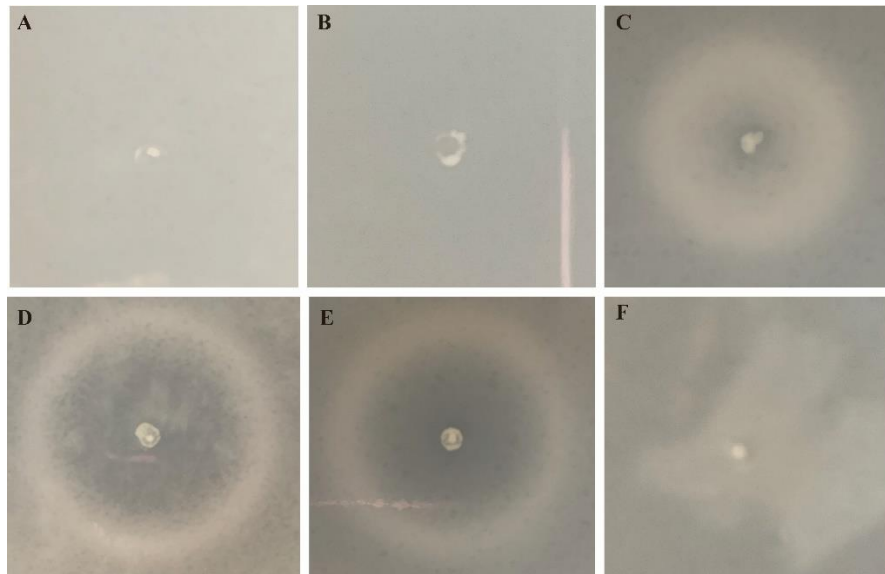

**Fig. S1** Alginate degradation of strain *V. pelagius* WXL662 under different temperature. A, 0 °C; B, 4 °C; C, 16 °C; D, 28 °C; E, 37 °C; F, 45 °C.

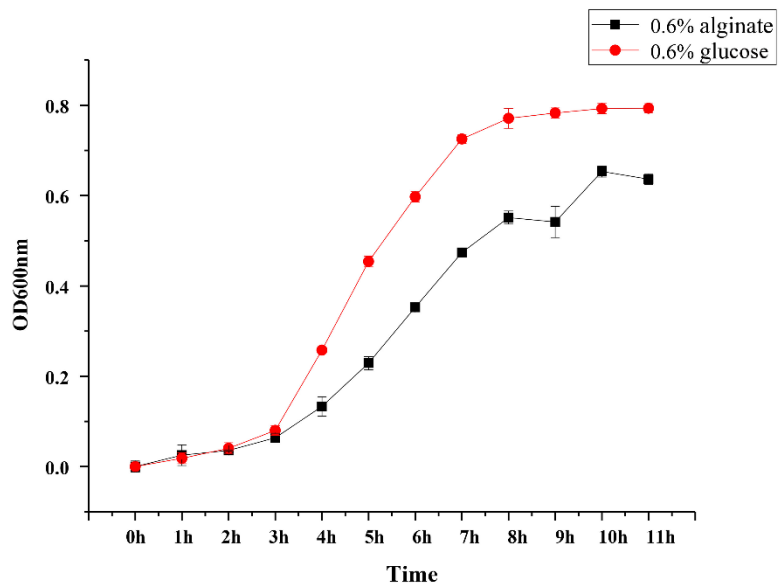

**Fig. S2** The growth curves of strain WXL662 cultured in mineral medium containing 0.6 % (w/v) glucose and alginate as the sole carbon source, respectively.

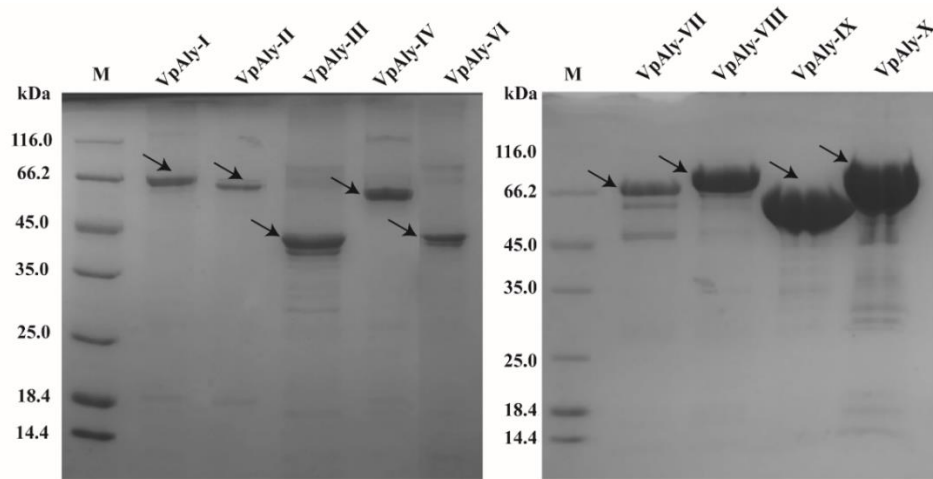

**Fig. S3** SDS-PAGE of nine purified recombinant alginate lyases (VpAly-V was studied by Zhang et al., 2022). M: marker.

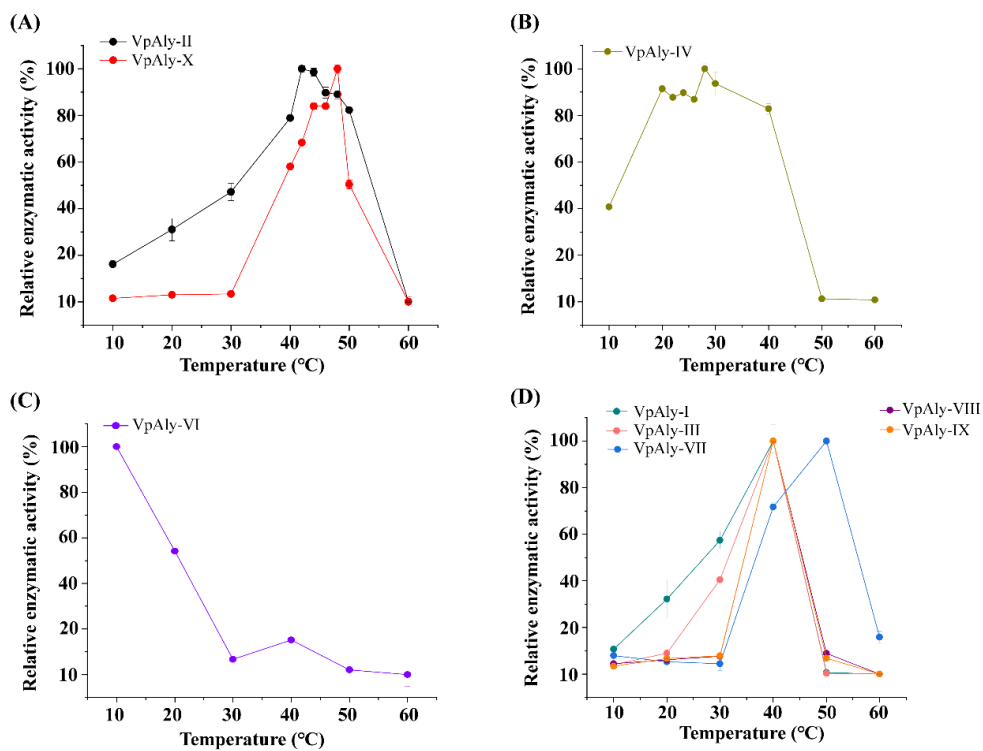

**Fig. S4** The activity of nine recombinant alginate lyases in strain WXL662 under different temperature. (A), The optimum temperature of VpAly-I and VpAly-X; (B), The optimum temperature of VpAly-IV; (C), The optimum temperature of VpAly-VI; (D), The optimum temperature of VpAly-I, -III, -VII, -VIII and -IX. The optimum temperature of VpAly-V was detected at 40 °C by Zhang et al. (2022).

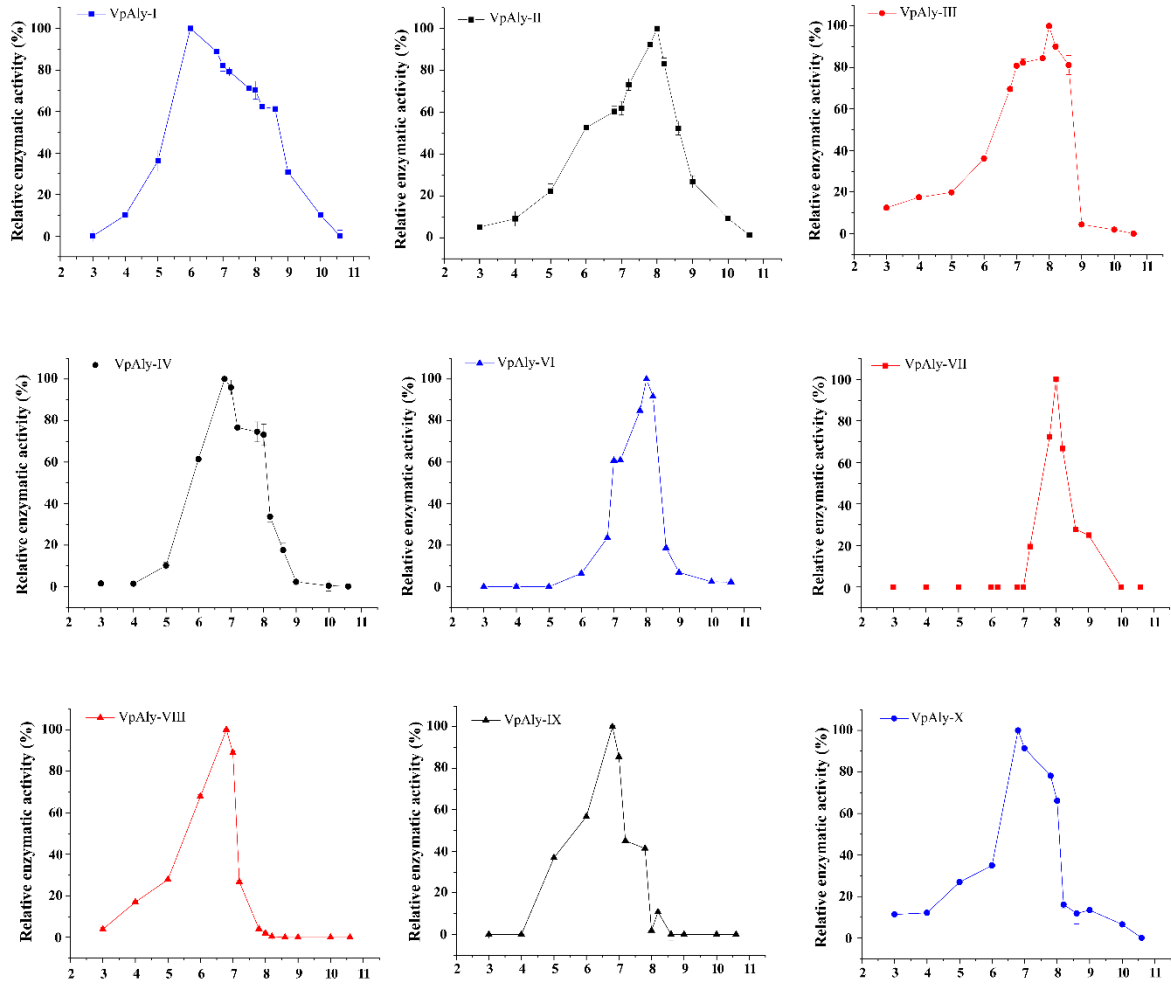

**Fig. S5** The activity of nine recombinant alginate lyases in strain WXL662 under different pH.

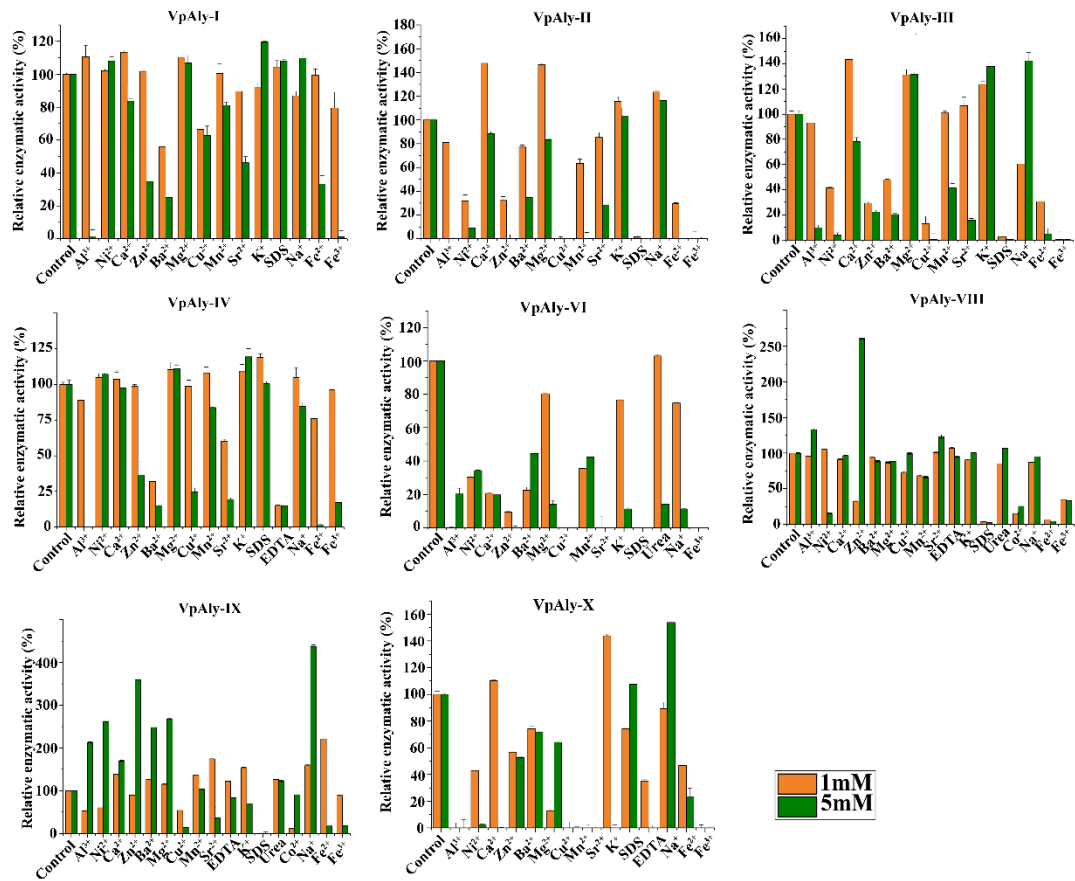

**Fig. S6** Responses of recombinant alginate lyase to different metal ions and reducing agents.

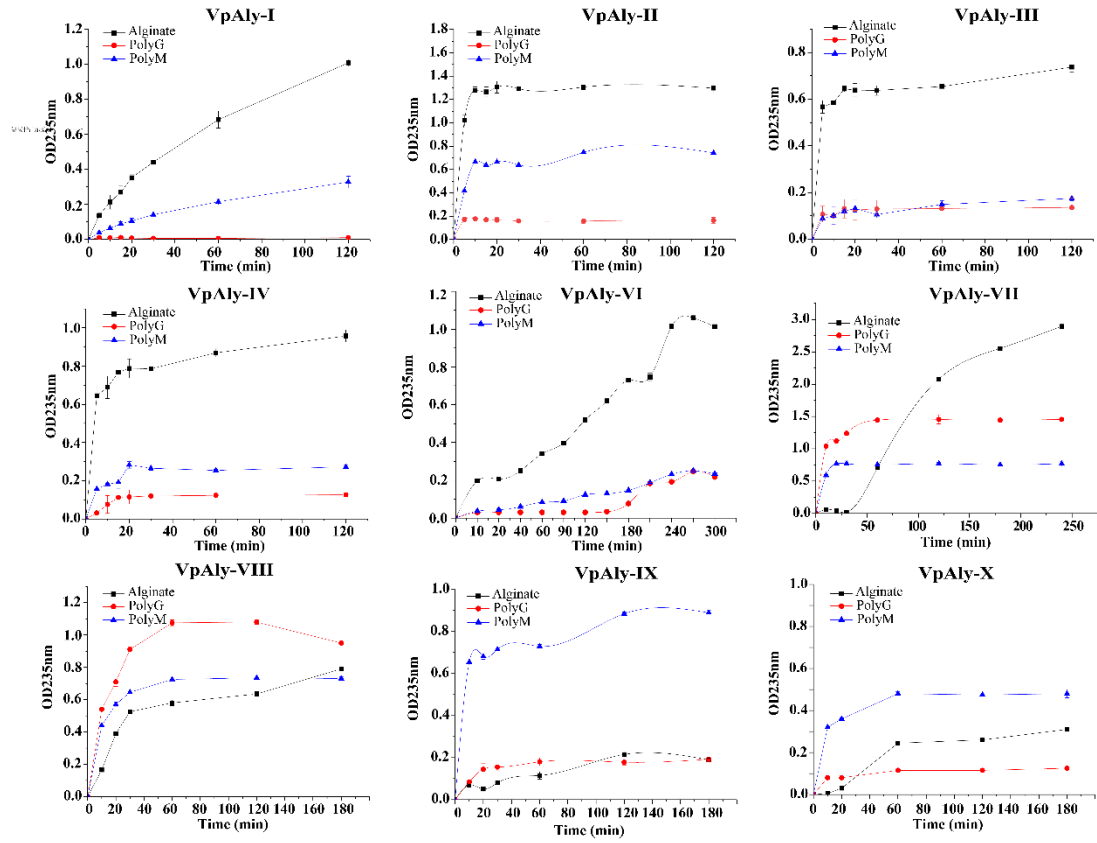

**Fig. S7** Substrate preferences of nine recombinant alginate lyases. The black squares represent the degradation of alginate, the red dots represent the degradation of polyG, and the blue triangles represent the degradation of polyM.

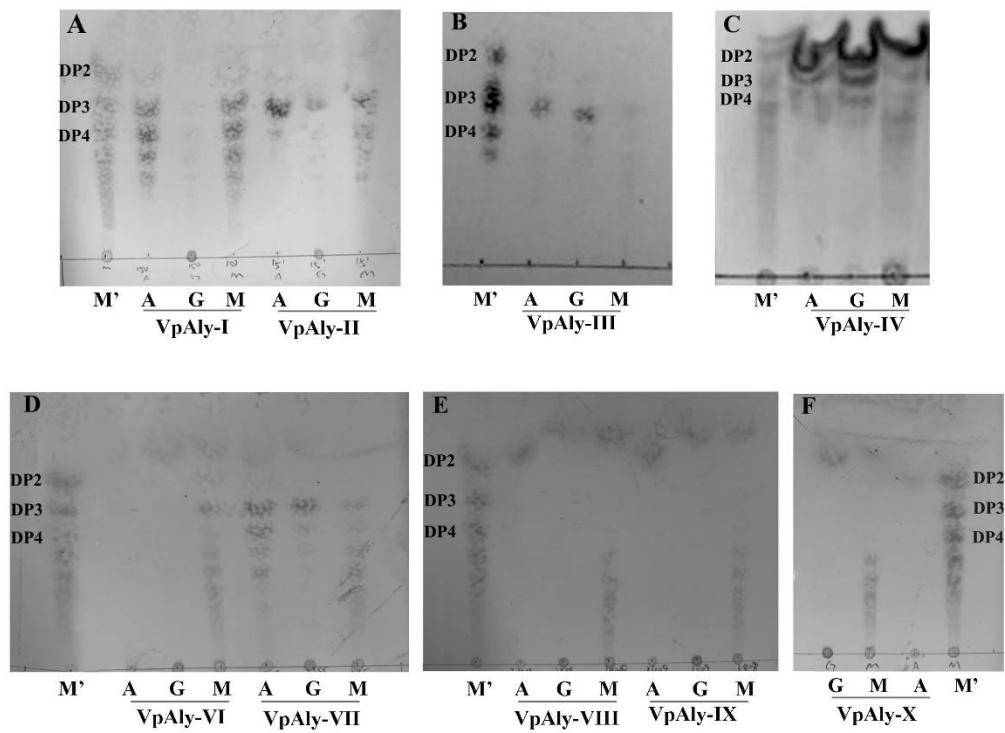

**Fig. S8** Thin layer chromatography (TLC) analysis of the alginate oligosaccharides. Std: alginate oligosaccharide standards, DP2-DP4: the mannuronic acid sodium salt dimer, trimer and tetramer (M'). A, alginate; G, polyG; M, polyM.

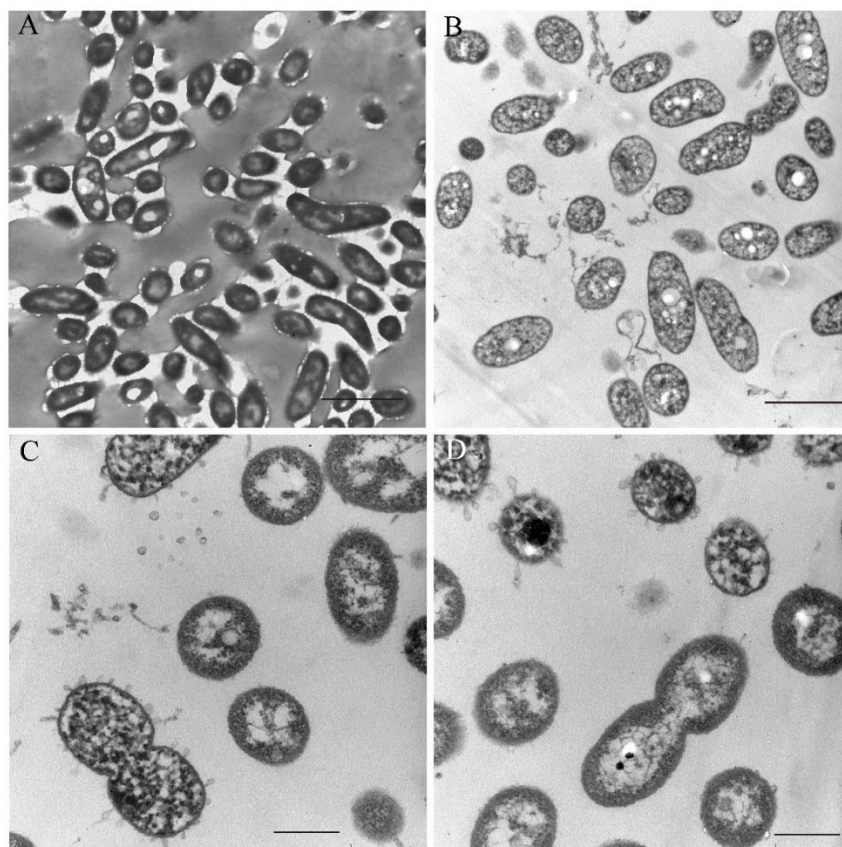

**Fig. S9** Scanning electron microscopy (SEM) of the morphology and internal structure of the strain WXL662 in different medium. A: Morphology and internal structure of strain WXL662 cultured on MA, (Bar, 2  $\mu\text{m}$ ); B: Morphology and internal structure of strain WXL662 cultured with glucose as the sole carbon source, (Bar, 2  $\mu\text{m}$ ); C, D: Morphology and internal structure of strain WXL662 cultured with alginate as the sole carbon source, (Bar, 500 nm).



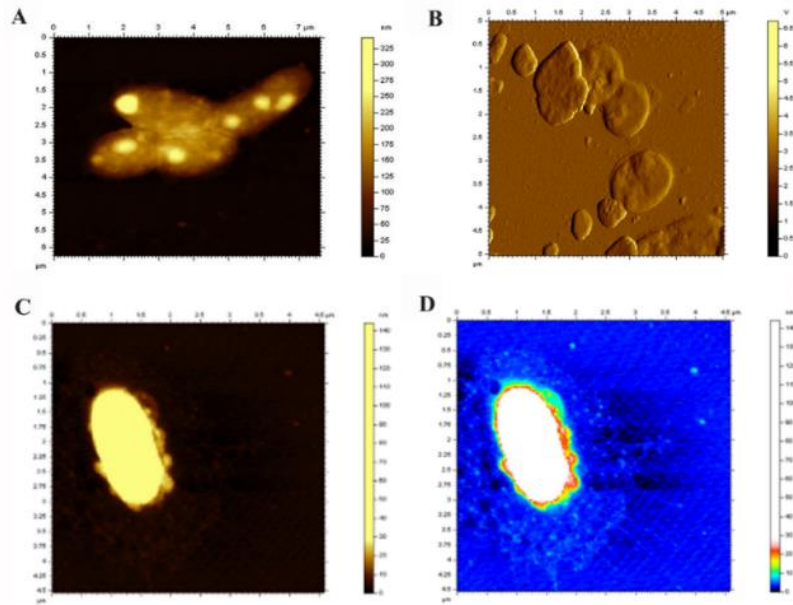

**Fig. S10** Atomic force electron micrograph (AFM) of strain WXL662 under different culture conditions. A: Morphology of strain WXL662 cultured with glucose as the sole carbon source; B, C, D: Morphology of strain WXL662 cultured with alginate as sole carbon source.

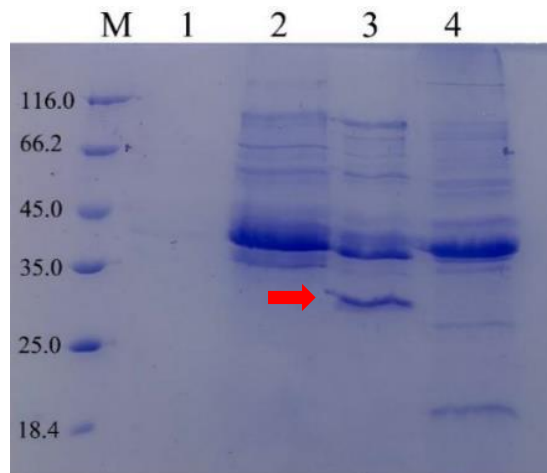

**Fig. S11** SDS-PAGE of crude vesicles under different culture conditions.

M: marker; 1, Fermentation supernatant of glucose sole carbon source mineral medium; 2, Crude out membrane vesicles (OMVs) component cultured with glucose as the sole carbon source; 3, Crude OMVs component cultured with alginate as sole carbon source; 4, Crude OMVs component cultured in MB medium.

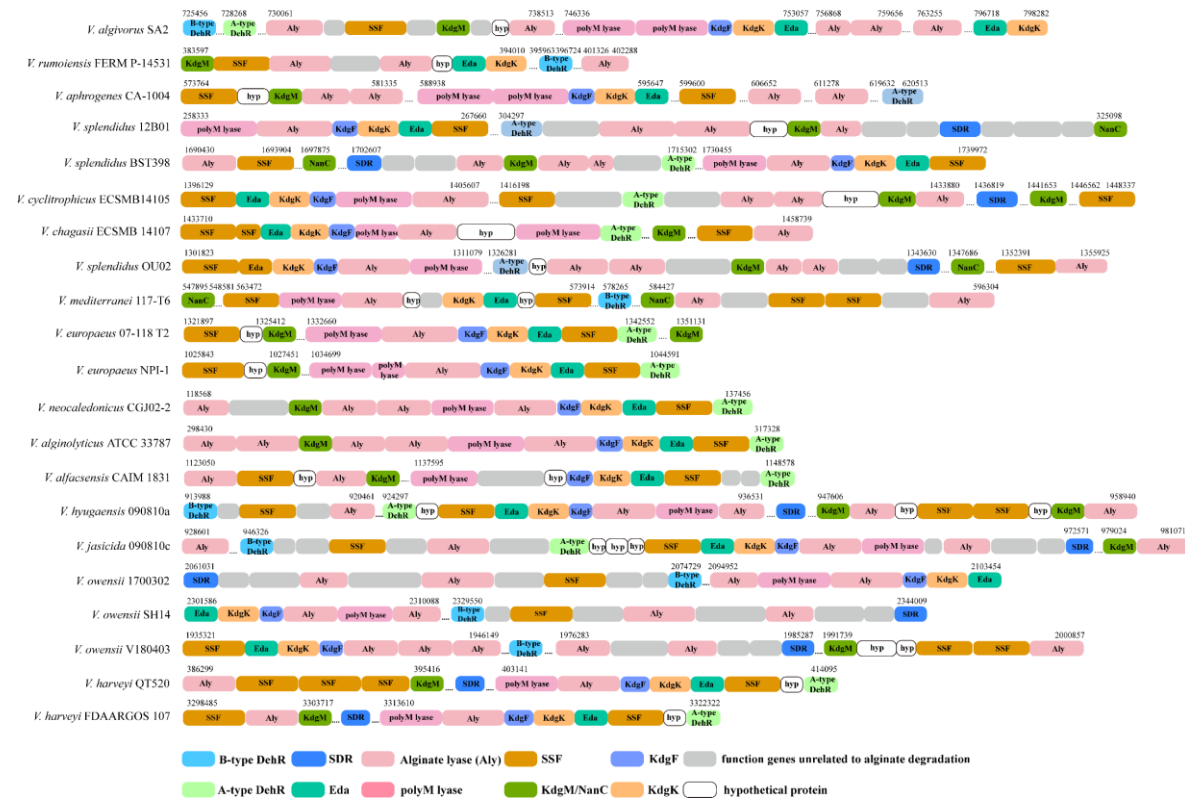

**Fig. S12** The AUL encoded in the 21 alginate-degrading *Vibrio* strains. A-type DehR, 3-hydroxyisobutyrate dehydrogenase; B-type DehR, 2-dehydro-3-deoxy-D-gluconate 5-dehydrogenase; Aly, alginate lyase; SSF, sodium-solute symporter (alginate transport system, termed ToaA); polyM lyases, poly(beta-D-mannuronate) lyase; KdgF, Pectin degradation protein KdgF; KdgK, (KdgK-like protein, 2-dehydro-3-deoxygluconokinase); Eda, 2-dehydro-3-deoxyphosphogluconate aldolase; hyp, hypothetical protein; SDR, Short-chain dehydrogenase/reductase SDR, KdgM, oligogalacturonate-specific porinin KdgM; NanC, N-acetylneuraminic acid outer membrane channel protein, NanC.

**Table S1** The general information of *V. pelagius* WXL662 genome

| <i>V. pelagius</i> WXL662 |                   |
|---------------------------|-------------------|
| Genome size               | 4.64 Mbp          |
| Contigs                   |                   |
| macro-chromosome (Chr-I)  | 3.06 Mbp          |
| micro-chromosome (Chr-II) | 1.31 Mbp          |
| large-plasmid (Plas-I)    | 0.24 Mbp          |
| small-plasmid (Plas-II)   | 0.03 Mbp          |
| GC Content                | 45.1%             |
| N50                       | 3057849           |
| Number of coding proteins | 4178              |
| Number of RNAs            | 175 (13 16S rRNA) |

**Table S2** Genes related to alginate degradation in the genome of *V. pelagius* WXL662

| Gene ID  | Gene locus                  | Gene function                                                      |
|----------|-----------------------------|--------------------------------------------------------------------|
| peg.150  | tig00000000_188109_189860   | Alginate lyase                                                     |
| peg.151  | tig00000000_191636_190068   | Alginate lyase                                                     |
| peg.153  | tig00000000_194879_194013   | Outer membrane porin (KdgM)                                        |
| peg.154  | tig00000000_195934_195617   | Pectin degradation protein KdgF                                    |
| peg.155  | tig00000000_196935_196156   | Short-chain dehydrogenase/reductase (SDR)                          |
| peg.718  | tig00000000_877423_876386   | Alginate lyase                                                     |
| peg.2434 | tig00000000_2809217_2810566 | Alginate lyase                                                     |
| peg.2547 | tig00000000_2942395_2943258 | Alginate lyase                                                     |
| peg.2812 | tig00000003_204206_203487   | SDR                                                                |
| peg.2942 | tig00000003_350099_349050   | Alginate lyase                                                     |
| peg.3358 | tig00000003_828676_827060   | Alginate lyase                                                     |
| peg.3399 | tig00000003_886197_886871   | N-acetylneuraminic acid outer membrane channel protein NanC (NanC) |
| peg.3408 | tig00000003_898818_896668   | poly(beta-D-mannuronate) lyase (polyM lyase)                       |
| peg.3409 | tig00000003_901004_898821   | polyM lyase                                                        |
| peg.3410 | tig00000003_901337_901672   | Pectin degradation protein KdgF                                    |
| peg.3411 | tig00000003_901707_902645   | 2-dehydro-3-deoxygluconate kinase (KdgK-like protein)              |
| peg.3412 | tig00000003_902776_903402   | 2-dehydro-3-deoxyphosphogluconate aldolase (Eda)                   |
| peg.3679 | tig00000003_1214759_1214130 | Eda                                                                |
| peg.3680 | tig00000003_1215727_1214780 | KdgK-like protein                                                  |
| peg.3962 | tig00000004_207008_204972   | Alginate lyase                                                     |
| peg.3968 | tig00000004_216126_216800   | NanC                                                               |
| peg.3967 | tig00000004_215052_216110   | Alginate lyases                                                    |
| peg.3968 | tig00000004_216126_216800   | NanC                                                               |
| peg.3972 | tig00000004_221933_221151   | Transcriptional regulator KdgR, KDG operon repressor               |
| peg.3976 | tig00000004_223537_223857   | Pectin degradation protein KdgF                                    |
| peg.3978 | tig00000004_225489_224866   | Eda                                                                |
| peg.3979 | tig00000004_226432_225503   | KdgK-like protein                                                  |

**Table S3** Primers used in cloning 11 alginate lyases in *V. Pelagius* WXL662. Primers were designed using the Primer-primer 5 design tool. The cleavage sites are represented in lowercase.

| Primer       | Sequence (5'-3') b                 | Restriction Site and Mutant Amino Acid |
|--------------|------------------------------------|----------------------------------------|
| VpAly-I-F    | 5'- CAGGAATTCATGTCATCAAGCGAGC -3'  | EcoR I                                 |
| VpAly-I-R    | 5'- CCGCTCGAGTTACTGTGTATGTTTCG -3' | Xho I                                  |
| VpAly-II-F   | 5'- CCGGAATTCATGGCAAGTACCTCAG -3'  | EcoR I                                 |
| VpAly-II-R   | 5'- CCGCTCGAGTTAGCCTTGGA ACTCA -3' | Xho I                                  |
| VpAly-III-F  | 5'- CGCGGATCCATGGCAGATACAGATA -3'  | BamH I                                 |
| VpAly-III-R  | 5'- CCGCTCGAGTTACTGGTTTAAATCC -3'  | Xho I                                  |
| VpAly-IV-F   | 5'-CACGGATCCATGGAACAGCTAAATA -3'   | BamH I                                 |
| VpAly-IV-R   | 5'-CCGGAATTCGTTATGACTATTATCG -3'   | EcoR I                                 |
| VpAly-V-F    | 5'- CACGGATCCATGGCAAATGCTTCAG -3'  | BamH I                                 |
| VpAly-V-R    | 5'- CCGCTCGAGTTAACGAATTACTGGC -3'  | Xho I                                  |
| Aly2942-F    | 5'- CGCGGATCCATGGAAGTAGTTAACA -3'  | BamH I                                 |
| Aly2942-R    | 5'- CCGCTCGAGTTACTTTCCGTTTAAAC -3' | Xho I                                  |
| VpAly-VI-F   | 5'- CGCGGATCCATGCAAGAGAACACAT-3'   | BamH I                                 |
| VpAly-VI-R   | 5'- CCGCTCGAGCTACTTGGTCGTATTA -3'  | Xho I                                  |
| VpAly-VII-F  | 5'- CGCGGATCCATGACTATCAACCAC -3'   | BamH I                                 |
| VpAly-VII-R  | 5'- CCGCTCGAGAAGCTTAGCGAATGCA -3'  | Xho I                                  |
| VpAly-VIII-F | 5'- CGCGGATCCATGACTACACAACCAA -3'  | BamH I                                 |
| VpAly-VIII-R | 5'- CTGCTCGAGTTTCTCCTGACCAGCT -3'  | Xho I                                  |
| VpAly-X-F    | 5'- CACGGATCCATGATCCAGTTTAGCG -3'  | BamH I                                 |
| VpAly-X-R    | 5'- CCGCTCGAGACTGAATGTCAGTTTC -3'  | Xho I                                  |
| VpAly-XI-F   | 5'-CGGAATTCCTGAAGCAAGATTCAATT-3'   | EcoR I                                 |
| VpAly-XI-R   | 5'-CCGCTCGAGTTATTTAAACAATAGA-3'    | Xho I                                  |

**Table S4** The primers used in RT-qPCR. Primers were designed using the Primer-primer 5 design tool. The abbreviation of each gene in the primer: R5A, Ribose 5-phosphate isomerase A; KdgK, KdgK-like protein (2-dehydro-3-deoxygluconate kinase); Eda, 2-dehydro-3-deoxyphosphogluconate aldolase; PGK, Phosphoglycerate kinase; TonB, TonB-dependent heme receptor A; PGAM-i, 2,3-bisphosphoglycerate-independent phosphoglycerate mutase.

| <b>Primer</b>   | <b>Sequence (5'-3') b</b>          |
|-----------------|------------------------------------|
| recA-2-F        | 5'-AGTTCTACGCATCTGTTCTGCTTTGA -3'  |
| recA-2-R        | 5'- TGACCAATCTTATCGCCGTTGTAGC-3'   |
| ftsZ-F          | 5'-GCAACAGGTATTGGCACTGAGAGAA -3'   |
| ftsZ-R          | 5'- GCCTGACGTCGTAAGAATGCTGGAA-3'   |
| YG-R5A-F        | 5'-CAGTAGAAGTTATCCCAATGGCTCG -3'   |
| YG-R5A-R        | 5'-GACCAACAGTTACAACACCAGCAAT -3'   |
| YG-KdgM1-F      | 5'- CAAGTTCGTGTTCAATACTCGTTTCG-3'  |
| YG-KdgM1-R      | 5'- TACCGAATTCTACATACGGACGCCA-3'   |
| YG-KdgM2-F      | 5'- TCTTTTGATTTCAGGGTTGTTACTA-3'   |
| YG-KdgM2-R      | 5'- GCCGTTATCAAAGAATACTTGGTCA-3'   |
| YG-TonB-F       | 5'-CTTTTCAGTGGCTTACGTTCTGTTGC -3'  |
| YG-TonB-R       | 5'- GCACCGAACGAGAGCCCTTTGACTT-3'   |
| YG-KdgK -F      | 5'-GCATTATGTTGCTCCTAACCCAGTA -3'   |
| YG-KdgK-R       | 5'-TTCTTTTGGGAATAATCGCACCTTGG -3'  |
| YG- Eda -F      | 5'-TAGTTGAACAAGCAATGGAAATGGG -3'   |
| YG- Eda A-R     | 5'-GGGATAGATAGGTATTTCGTCAACGT -3'  |
| YG-PGK-F        | 5'- CGCTAAAACCTATCCTTTGGAACGGT-3'  |
| YG-PGK-R        | 5'- TTCAACGAACTCAAGGAAAGCACCG-3'   |
| YG-PGAM-i-F     | 5'-AGAGAACACATACGGTGAGTGGCTA -3'   |
| YG-PGAM-i-R     | 5'-ATTTCTGGTTGTAGGTCGTAAGTCG -3'   |
| YG-VpAly-I-F    | 5'- TGGTGGATGGTCAGATGCACTTTTCG -3' |
| YG-VpAly-I-R    | 5'- GAGTATGATTTTTTGCCTTCGTTTCG -3' |
| YG-VpAly-II-F   | 5'- GCGTGAAGGCAAAGAAGATGCTGTT -3'  |
| YG-VpAly-II-R   | 5'- TTGGAACTCACCGTATGTTGCGTCT -3'  |
| YG-VpAly-III-F  | 5'- CAGAATGCGAAAGATGAGAACGGTA -3'  |
| YG-VpAly-III-R  | 5'- TTACCTTTTCGCCAAATCCACTTCAT -3' |
| YG-VpAly-IV-F   | 5'- ATCTGAATAGTCTAAGTAACCCGAG -3'  |
| YG-VpAly-IV-R   | 5'- TCTGATAGAAGGTCACCTTGGGCATA -3' |
| YG-VpAly-V-F    | 5'- TGCCTGGTTACAAAAATCGTAGTGA -3'  |
| YG-VpAly-V-R    | 5'- ACCACAGTTCACAGCATTGTTCTTA -3'  |
| YG-VpAly-VI-F   | 5'- CAAACCGTGAGGATATTGCTTACCC -3'  |
| YG-VpAly-VI-R   | 5'- ACTGACCATACGCACCTGCTTTGAA -3'  |
| YG-VpAly-VII-F  | 5'- AAATCGGGTGACAACACAATCGCAG -3'  |
| YG-VpAly-VII-R  | 5'- ATCACACCATCACGCCACGAGTAT -3'   |
| YG-VpAly-VIII-F | 5'- ACGACTCAGTAATCAAGACAACCTC-3'   |
| YG-VpAly-VIII-R | 5'- GTTGAATGGTTTGATTTCTGCTGCT-3'   |
| YG-VpAly-IX-F   | 5'-AGTTATCTTTACTCGTTCTGGCGCG -3'   |
| YG-VpAly-IX-R   | 5'-TCAGTAGTGTGAGTCGCACCCAGTT -3'   |
| YG-VpAly-X-F    | 5'-TATTCTGTGTTGGCGAAGCCTATGT -3'   |
| YG-VpAly-X-R    | 5'-TAGCGATGGGAGTGTGCTGAAACCG -3'   |

**Table S5** The information of 95 *Vibrio* genomes.

| <b>Genome</b>                       | <b>Accession</b> | <b>Numbers of chromosome</b> | <b>Numbers Plasmid</b> |
|-------------------------------------|------------------|------------------------------|------------------------|
| <i>Vibrio metschnikovii</i> 07-2421 | GCA_009763925.1  | 2                            | 0                      |
| <i>V. metschnikovii</i> 2012V-1020  | GCA_009665235.1  | 2                            | 0                      |
| <i>V. metschnikovii</i> 9502-00     | GCA_009763765.1  | 2                            | 0                      |
| <i>V. cincinnatiensis</i> 1398-82   | GCA_009763485.1  | 2                            | 0                      |
| <i>V. cincinnatiensis</i> 2070-81   | GCA_009763705.1  | 2                            | 0                      |
| <i>V. cincinnatiensis</i> F8054     | GCA_009763885.1  | 2                            | 0                      |
| <i>V. fluvialis</i> 12605           | GCA_001952955.1  | 2                            | 0                      |
| <i>V. fluvialis</i> FDAARGOS_100    | GCA_002953375.1  | 2                            | 0                      |
| <i>V. fluvialis</i> F8658           | GCA_009764195.1  | 2                            | 1                      |
| <i>V. furnissii</i> 2419-04         | GCA_009665335.1  | 2                            | 1                      |
| <i>V. furnissii</i> 2012V-1225      | GCA_009764175.1  | 2                            | 0                      |
| <i>V. furnissii</i> 2013V-1001      | GCA_009763225.1  | 2                            | 0                      |
| <i>V. metoecus</i> 06-2478          | GCA_009763865.1  | 2                            | 0                      |
| <i>V. metoecus</i> 08-2459          | GCA_009665275.1  | 2                            | 0                      |
| <i>V. metoecus</i> 2011V-1015       | GCA_009763905.1  | 2                            | 0                      |
| <i>V. mimicus</i> 2011V-1073        | GCA_009665195.1  | 2                            | 0                      |
| <i>V. mimicus</i> SCCF01            | GCA_001767355.1  | 2                            | 0                      |
| <i>V. mimicus</i> FDAARGOS_112      | GCA_001558475.2  | 2                            | 0                      |
| <i>V. cholerae</i> E4               | GCA_003719755.1  | 2                            | 1                      |
| <i>V. cholerae</i> O395             | GCA_000021625.1  | 2                            | 0                      |
| <i>V. paracholerae</i> NCTC 30      | GCA_900538065.1  | 2                            | 0                      |
| <i>V. gazogenes</i> ATCC 43942      | GCA_002196515.1  | 2                            | 1                      |
| <i>V. spartinae</i> 3.6             | GCA_014083925.1  | 2                            | 0                      |
| <i>V. tritonius</i> JCM 16456       | GCA_001547935.1  | 2                            | 0                      |
| <i>V. anguillarum</i> CNEVA NB11008 | GCA_002212025.1  | 2                            | 0                      |
| <i>V. anguillarum</i> J360          | GCA_003399575.2  | 2                            | 1                      |
| <i>V. anguillarum</i> 90-11-286     | GCA_001660505.2  | 202 contigs                  |                        |
| <i>V. qinghaiensis</i> Q67          | GCA_002257545.1  | 2                            | 0                      |
| <i>V. alginovor</i> SA2             | GCA_002218005.2  | 2                            | 0                      |
| <i>V. rumoiensis</i> FERM P-14531   | GCA_002218045.2  | 2                            | 2                      |
| <i>V. aphrogenes</i> CA-1004        | GCA_002157735.2  | 2                            | 0                      |
| <i>V. casei</i> DSM 22364           | GCA_002218025.2  | 2                            | 3                      |
| <i>V. breoganii</i> FF50            | GCA_001677275.1  | 2                            | 1                      |

|                                           |                 |              |   |
|-------------------------------------------|-----------------|--------------|---|
| <i>V. haliotocoli</i> IAM 14596           | GCA_003568965.1 | 6 scaffolds  |   |
| <i>V. nigripulchritudo</i> SFn1           | GCA_000801275.1 | 2            | 0 |
| <i>V. nigripulchritudo</i> TUMSAT-TG-2018 | GCA_015097735.1 | 2            | 4 |
| <i>V. tapetis</i> CECT4600                | GCA_900233005.1 | 2            | 1 |
| <i>V. atlanticus</i> LGP32                | GCA_000091465.1 | 2            | 0 |
| <i>V. splendidus</i> 12B01                | GCA_000152765.1 | 26 scaffolds |   |
| <i>V. splendidus</i> BST398               | GCA_003345295.1 | 2            | 0 |
| <i>V. cyclitrophicus</i> ECSMB14105       | GCA_005144905.1 | 2            | 0 |
| <i>V. chagasii</i> ECSMB14107             | GCA_004022545.1 | 2            | 0 |
| <i>V. splendidus</i> OU02                 | GCA_003408655.1 | 3 scaffolds  |   |
| <i>Vibrio</i> sp. THAF190c                | GCA_009363355.1 | 1            | 5 |
| <i>V. mediterranei</i> 117-T6             | GCA_003726935.1 | 2            | 1 |
| <i>V. mediterranei</i> QT6D1              | GCA_002214345.1 | 2            | 1 |
| <i>V. astriarenae</i> HN897               | GCA_010587385.1 | 2            | 0 |
| <i>V. coralliilyticus</i> RE22            | GCA_003391375.1 | 2            | 1 |
| <i>V. coralliilyticus</i> RE98            | GCA_000772065.1 | 2            | 2 |
| <i>V. coralliilyticus</i> SNUTY-1         | GCA_002073995.1 | 2            | 2 |
| <i>V. aquimaris</i> THAF100               | GCA_009363415.1 | 1            | 3 |
| <i>V. europaeus</i> 07/118 T2             | GCA_015654285.1 | 2            | 1 |
| <i>V. europaeus</i> NPI-1                 | GCA_013154935.1 | 2            | 1 |
| <i>V. tubiashii</i> ATCC 19109            | GCA_000772105.1 | 2            | 3 |
| <i>V. taketomensis</i> C4III282           | GCA_009938165.1 | 2            | 0 |
| <i>V. taketomensis</i> C4III291           | GCA_009938185.1 | 2            | 1 |
| <i>V. panuliri</i> JCM 19500              | GCA_009938205.1 | 2            | 1 |
| <i>V. ponticus</i> DSM 16217              | GCA_009938225.1 | 2            | 1 |
| <i>V. scophthalmi</i> VS-05               | GCA_001687805.1 | 2            | 2 |
| <i>V. scophthalmi</i> VS-12               | GCA_001685465.1 | 2            | 3 |
| <i>V. cidicii</i> 2756-81                 | GCA_009763805.1 | 2            | 0 |
| <i>V. navarrensis</i> 08-2462             | GCA_009665215.1 | 2            | 0 |
| <i>V. navarrensis</i> 2462-79             | GCA_009763725.1 | 2            | 0 |
| <i>V. vulnificus</i> FORC_017             | GCA_001675245.1 | 2            | 1 |
| <i>V. vulnificus</i> FORC_053             | GCA_003522555.1 | 3            | 0 |
| <i>V. vulnificus</i> FORC_036             | GCA_002117205.1 | 2            | 1 |
| <i>V. alginolyticus</i> K04M3             | GCA_002149105.1 | 2            | 1 |
| <i>V. alginolyticus</i> K06K5             | GCA_002119565.1 | 2            | 2 |
| <i>V. neocaledonicus</i> CGJ02-2          | GCA_005239365.1 | 2            | 0 |



|                                             |                 |   |   |
|---------------------------------------------|-----------------|---|---|
| <i>V. alginolyticus</i> ATCC 33787          | GCA_001469735.1 | 2 | 3 |
| <i>V. antiquarius</i> EX25                  | GCA_000024825.1 | 2 | 0 |
| <i>V. diabolicus</i> LMG 3418               | GCA_002953355.1 | 2 | 0 |
| <i>V. diabolicus</i> FDAARGOS_96            | GCA_002953335.1 | 2 | 1 |
| <i>V. diabolicus</i><br>FDAARGOS_105        | GCA_002953395.1 | 2 | 0 |
| <i>V. natriegens</i> CCUG 16371             | GCA_001680045.1 | 2 | 0 |
| <i>V. natriegens</i> CCUG 16373             | GCA_001680065.1 | 2 | 0 |
| <i>V. natriegens</i> CCUG 16374             | GCA_001680085.1 | 2 | 0 |
| <i>V. parahaemolyticus</i><br>20160303005-1 | GCA_009883875.1 | 2 | 5 |
| <i>V. parahaemolyticus</i> PB1937           | GCA_003351885.1 | 2 | 2 |
| <i>V. parahaemolyticus</i> 19-021-<br>D1    | GCA_009734325.1 | 2 | 2 |
| <i>V. alfacsensis</i> CAIM 1831             | GCA_003544875.1 | 2 | 1 |
| <i>V. rotiferianus</i> AM7                  | GCA_007182835.1 | 2 | 1 |
| <i>V. rotiferianus</i> B64D1                | GCA_002214395.1 | 2 | 0 |
| <i>V. hyugaensis</i> 090810a                | GCA_002906655.1 | 2 | 0 |
| <i>V. jasicida</i> 090810c                  | GCA_002887615.1 | 2 | 0 |
| <i>V. owensii</i> 1700302                   | GCA_003691505.1 | 2 | 2 |
| <i>V. owensii</i> SH14                      | GCA_001310575.2 | 2 | 2 |
| <i>V. owensii</i> V180403                   | GCA_003691545.1 | 2 | 2 |
| <i>V. harveyi</i> 345                       | GCA_002850295.1 | 2 | 2 |
| <i>V. harveyi</i> QT520                     | GCA_001908435.2 | 2 | 3 |
| <i>V. harveyi</i> FDAARGOS_107              | GCA_001558435.2 | 2 | 0 |
| <i>V. campbellii</i> LA16-V1                | GCA_002142655.1 | 2 | 4 |
| <i>V. campbellii</i> 170502                 | GCA_003691485.1 | 2 | 1 |
| <i>V. campbellii</i> LMB29                  | GCA_001969325.1 | 2 | 4 |

---

**Table S6** The predicted subcellular localization of key proteins in the alginate metabolism pathway of strain WXL662.

CP, cytoplasm; EC, extracellular space; IM, inner membrane; OM, outer membrane; PP, periplasm; UN, Unknown; Y, Yes (coding peptide); N, No, (No codingpeptide); The numbers in the Bomp category column indicate the number of  $\beta$  barrels in the outer membrane protein; SP I, signal peptide Type I; SP II, signal peptide Type II; CYT, No signal peptide in the cytoplasm.

Cello gives the predicted score at different positions based on the amino acid composition. The location with the score marked \* is the more likely position of the target protein. PsortB provide the location of the protein. Phobius TM and TMHMM predict the number of transmembrane spirals (TMs) in the inner membrane component. Bomp determines the number of  $\beta$  barrels in the outer membrane protein. Phobius SP, SMART and Lipop can predict whether proteins have signal peptides.

| Gene No. | Protein name | Predicted localization | Cello                                                     | PsortB | Phobius TM | TMHMM | Phobius SP | SMART (Signal p) | LipoP class | Bomp category |
|----------|--------------|------------------------|-----------------------------------------------------------|--------|------------|-------|------------|------------------|-------------|---------------|
| peg.150  | VpAly-I      | EC                     | EC: 1.090 OM: 0.236<br>PP: 1.063 IM: 0.335<br>CP:2.276 *  | UN     | 0          | 0     | Y          | Y                | SP II       | 0             |
| peg.151  | VpAly-II     | EC                     | EC: 0.855 OM: 0.169<br>PP: 1.402 IM: 0.336<br>CP:2.239 *  | EC     | 0          | 0     | Y          | Y                | SP II       | 0             |
| peg.718  | VpAly-III    | PP                     | EC: 0.832 OM: 0.160<br>PP: 1.499* IM: 0.315<br>CP:2.194 * | EC     | 0          | 0     | Y          | Y                | SP I        | 0             |
| peg.2434 | VpAly-IV     | EC                     | EC: 1.388 OM:0.195<br>PP: 0.925 IM: 0.319<br>CP:2.173 *   | EC     | 0          | 0     | Y          | Y                | SP I        | 0             |
| peg.2547 | VpAly-V      | EC                     | EC: 0.782 OM:0.193<br>PP: 1.461 IM: 0.326<br>CP:2.239 *   | UN     | 0          | 0     | Y          | Y                | SP I        | 0             |
| peg.2942 | VpAly-VI     | EC                     | EC: 0.863 OM:0.160                                        | EC     | 0          | 0     | Y          | Y                | SP I        | 0             |



**Table S7** Comparison of qRT-qPCR and transcriptome results of different genes.

| Number | Gene ID            | Protein                                                                            | RT-qPCR<br>(log <sub>2</sub> ) | transcript<br>(log <sub>2</sub> FC) |
|--------|--------------------|------------------------------------------------------------------------------------|--------------------------------|-------------------------------------|
| 1      | peg.150            | VpAly-I                                                                            | 2.44                           | 2.09                                |
| 2      | peg.151            | VpAly-II                                                                           | 4.8                            | 2.46                                |
| 3      | peg.718            | VpAly-III                                                                          | 2.43                           | 2.68                                |
| 4      | peg.2434           | VpAly-IV                                                                           | 3.75                           | 4.96                                |
| 5      | peg.2547           | VpAly-V                                                                            | 2.26                           | 1.94                                |
| 6      | peg.2942           | VpAly-VI                                                                           | 1.37                           | 1.97                                |
| 7      | peg.3358           | VpAly-VII                                                                          | 0.35                           | NC                                  |
| 8      | peg.3408           | VpAly-VIII                                                                         | 0.38                           | 0.51                                |
| 9      | peg.3409           | VpAly-IX                                                                           | 0.6                            | 1.18                                |
| 10     | peg.3962           | VpAly-X                                                                            | 0.3                            | 0.56                                |
| 11     | peg.153            | KdgM-1                                                                             | 4.5                            | 2.28                                |
| 12     | peg.3399           | KdgM-2                                                                             | 2.95                           | 3.49                                |
| 13     | DHCAACBI_018<br>22 | Ribose 5-phosphate<br>isomerase A                                                  | 2.78                           | 0.65                                |
| 14     | DHCAACBI_037<br>61 | 2-dehydro-3-<br>deoxygluconate kinase<br>(kdgk-like)                               | 1.57                           | 2.38                                |
| 15     | DHCAACBI_029<br>65 | 2-dehydro-3-<br>deoxyphosphogluconate<br>aldolase (Eda)                            | 1.98                           | 0.44                                |
| 16     | DHCAACBI_018<br>13 | Phosphoglycerate kinase                                                            | 2.89                           | 3.32                                |
| 17     | DHCAACBI_032<br>74 | TonB-dependent heme<br>receptor A                                                  | 3.25                           | 4.34                                |
| 18     | DHCAACBI_011<br>71 | 2,3-bisphosphoglycerate-<br>independent<br>phosphoglycerate mutase<br>(EC 5.4.2.1) | 2.74                           | 3.67                                |

**Table S8** Fold changes of alginate-degrading genes revealed by the transcriptome sequencing. Chr-I, Chromosome-I; Chr-II, Chromosome-II; Plas-I, Plasmid-I.

| Number | Gene ID  | Products                                                                      | log2FC<br>(Alg/Glu) | Position in<br>the genome |
|--------|----------|-------------------------------------------------------------------------------|---------------------|---------------------------|
| 1      | peg.148  | Nuclease SbcCD subunit C                                                      | NC                  | Chr-I.-AUL1               |
| 2      | peg.149  | Nuclease SbcCD subunit D                                                      | NC                  | Chr-I.-AUL1               |
| 3      | peg.150  | VpAly-I                                                                       | 2.09                | Chr-I.-AUL1               |
| 4      | peg.151  | VpAly-II                                                                      | 2.46                | Chr-I.-AUL1               |
| 5      | peg.152  | putative biofilm-associated surface protein                                   | 1.67                | Chr-I.-AUL1               |
| 6      | peg.153  | KdgM                                                                          | 2.28                | Chr-I.-AUL1               |
| 7      | peg.154  | Pectin degradation protein KdgF                                               | 1.66                | Chr-I.-AUL1               |
| 8      | peg.155  | Short-chain dehydrogenase/reductase (SDR)                                     | 1.19                | Chr-I.-AUL1               |
| 9      | peg.156  | Predicted signal-transduction protein containing cAMP-binding and CBS domains | 4.78                | Chr-I.-AUL1               |
| 10     | peg.157  | DNA polymerase III epsilon subunit                                            | 1.52                | Chr-I.-AUL1               |
| 11     | peg.158  | sodium-solute symporter, putative                                             | 1.32                | Chr-I.-AUL1               |
| 12     | peg.159  | Methyl-accepting chemotaxis protein, homolog 13                               | NC                  | Chr-I.-AUL1               |
| 13     | peg.718  | VpAly-III                                                                     | 2.68                | Chr-I                     |
| 14     | peg.719  | Proton/glutamate-aspartate symporter                                          | 2.74                | Chr-I                     |
| 15     | peg.723  | Outer membrane lipoprotein SmpA                                               | 1.39                | Chr-I                     |
| 16     | peg.2434 | VpAly-IV                                                                      | 4.96                | Chr-I                     |
| 17     | peg.2547 | VpAly-V                                                                       | 1.94                | Chr-I                     |
| 18     | peg.2942 | VpAly-VI                                                                      | NC                  | Chr-II                    |
| 19     | peg.3212 | TonB-dependent receptor                                                       | 4.73                | Chr-II.                   |
| 20     | peg.3358 | VpAly-VII                                                                     | 1.97                | Chr-II.                   |
| 21     | peg.3399 | NanC                                                                          | 3.49                | Chr-II-AUL2               |
| 22     | peg.3406 | putative ABC transporter solute-binding protein YclQ                          | NC                  | Chr-II-AUL2               |
| 23     | peg.3408 | VpAly-VIII                                                                    | NC                  | Chr-II-AUL2               |
| 24     | peg.3409 | VpAly-IX                                                                      | NC                  | Chr-II-AUL2               |
| 25     | peg.3410 | Pectin degradation protein KdgF                                               | NC                  | Chr-II-AUL2               |
| 26     | peg.3411 | 2-dehydro-3-deoxygluconate kinase (kdgK-like protein)                         | 3.19                | Chr-II-AUL2               |
| 27     | peg.3412 | 2-dehydro-3-deoxyphosphogluconate aldolase (Eda)                              | 2.02                | Chr-II-AUL2               |
| 28     | peg.3413 | sodium-solute symporter, putative                                             | 3.31                | Chr-II-AUL2               |
| 28     | peg.3414 | hypothetical protein                                                          | 1.26                | Chr-II-AUL2               |
| 30     | peg.3415 | hypothetical protein                                                          | NC                  | Chr-II-AUL2               |

|    |          |                                                                                     |      |             |
|----|----------|-------------------------------------------------------------------------------------|------|-------------|
| 32 | peg.3962 | VpAly-X                                                                             | NC   | Plas-I-AUL3 |
| 32 | peg.3963 | Uronate isomerase (EC 5.3.1.12)                                                     | NC   | Plas-I-AUL3 |
| 33 | peg.3964 | sodium-solute symporter, putative                                                   | 1.45 | Plas-I-AUL3 |
| 34 | peg.3965 | sodium-solute symporter, putative                                                   | 3.18 | Plas-I-AUL3 |
| 35 | peg.3966 | Streptococcal hemagglutinin protein                                                 | 1.25 | Plas-I-AUL3 |
| 36 | peg.3967 | VpAly-XI                                                                            | NC   | Plas-I-AUL3 |
| 37 | peg.3968 | NanC                                                                                | 2.88 | Plas-I-AUL3 |
| 38 | peg.3969 | Methyl-accepting chemotaxis protein                                                 | NC   | Plas-I-AUL3 |
| 39 | peg.3970 | DNA polymerase III epsilon subunit                                                  | NC   | Plas-I-AUL3 |
| 40 | peg.3971 | Predicted signal-transduction protein<br>containing cAMP-binding and CBS<br>domains | NC   | Plas-I-AUL3 |
| 41 | peg.3972 | Transcriptional regulator KdgR, KDG<br>operon repressor                             | 1.37 | Plas-I-AUL3 |
| 42 | peg.3973 | hypothetical protein                                                                | NC   | Plas-I-AUL3 |
| 43 | peg.3974 | 2-deoxy-D-gluconate 3-dehydrogenase<br>(KduD)                                       | NC   | Plas-I-AUL3 |
| 44 | peg.3975 | Arginine/ornithine antiporter ArcD                                                  | NC   | Plas-I-AUL3 |
| 45 | peg.3976 | Pectin degradation protein KdgF                                                     | 1.37 | Plas-I-AUL3 |
| 46 | peg.3977 | DEH ketol-isomerase                                                                 | 1.71 | Plas-I-AUL3 |
| 47 | peg.3978 | 2-dehydro-3-deoxyphosphogluconate<br>aldolase (Eda)                                 | NC   | Plas-I-AUL3 |
| 48 | peg.3979 | 2-dehydro-3-deoxygluconate kinase<br>(KdgK-like protein)                            | NC   | Plas-I-AUL3 |

---

**Table S9** Key proteins involved in the alginate degradation of 25 *Vibrio* strains.

AUL, alginate utilization loci; A-type DehR, 3-hydroxyisobutyrate dehydrogenase; B-type DehR, 2-dehydro-3-deoxy-D-gluconate 5-dehydrogenase; SSF, sodium-solute symporter; polyM lyases, poly(beta-D-mannuronate) lyase; KdgF, Pectin degradation protein KdgF; KdgK, 2-dehydro-3-deoxygluconokinase; Eda, 2-dehydro-3-deoxyphosphogluconate aldolase; hyp, hypothetical protein; SDR, Short-chain dehydrogenase/reductase SDR, KdgM, oligogalacturonate-specific porinin KdgM; NanC, N-acetylneuraminic acid outer membrane channel protein, NanC.

| Strains                            | Type                         | Location                                                                       | Alginate lyases | polyM lyases | DehR (3types) | KdgF | KdgK | Eda | KdgM | NanC |
|------------------------------------|------------------------------|--------------------------------------------------------------------------------|-----------------|--------------|---------------|------|------|-----|------|------|
| <i>V. alginivorus</i> SA2          | One AUL                      | Chromosome II                                                                  | 5               | 2            | 2             | 1    | 2    | 2   | 1    | 1    |
| <i>V. haliotocoli</i> IAM 14596T   | Scattered system             | Chromosome I, II                                                               | 9               | 1            | 3             | 1    | 1    | 1   | 0    | 0    |
| <i>V. splendidus</i> 12B01         | One AUL + one alginate lyase | Contig CH724170.1 (one alginate lyase) and Contig CH724171.1 (One AUL) plasmid | 5               | 2            | 3             | 1    | 3    | 3   | 1    | 2    |
| <i>V. splendidus</i> OU02          | One AUL                      |                                                                                | 6               | 1            | 3             | 1    | 5    | 5   | 1    | 1    |
| <i>V. alfacensis</i> CAIM 1831     | One AUL                      | Chromosome I                                                                   | 2               | 1            | 3             | 1    | 3    | 4   | 1    | 0    |
| <i>V. alginolyticus</i> ATCC 33787 | One AUL                      | Chromosome II                                                                  | 5               | 1            | 5             | 1    | 1    | 2   | 1    | 0    |
| <i>V. aphrogenes</i> CA-1004       | One AUL                      | Chromosome I                                                                   | 5               | 2            | 2             | 1    | 1    | 2   | 1    | 0    |

|                                        |                                    |                                                                                 |   |   |   |   |   |   |   |   |
|----------------------------------------|------------------------------------|---------------------------------------------------------------------------------|---|---|---|---|---|---|---|---|
| <i>V. astriarenae</i><br>HN897         | Scattered<br>system                | Chromosome I, II                                                                | 4 | 0 | 5 | 1 | 3 | 4 | 1 | 3 |
| <i>V. breoganii</i> FF50               | Scattered<br>system                | Chromosome I, II                                                                | 6 | 2 | 4 | 1 | 1 | 2 | 0 | 1 |
| <i>V. chagasii</i> ECSMB<br>14107      | One AUL                            | Chromosome I                                                                    | 2 | 2 | 1 | 1 | 1 | 3 | 1 | 0 |
| <i>V. cyclitrophicus</i><br>ECSMB14105 | One AUL+ one<br>alginate           | Chromosome I + II                                                               | 5 | 1 | 3 | 1 | 1 | 1 | 2 | 0 |
| <i>V. europaeus</i> 07-<br>118T2       | One AUL                            | Chromosome I                                                                    | 1 | 1 | 4 | 1 | 3 | 3 | 2 | 1 |
| <i>V. europaeus</i> NPI-1              | One AUL                            | Chromosome I                                                                    | 1 | 2 | 4 | 1 | 3 | 3 | 1 | 1 |
| <i>V. harveyi</i><br>FDAARGOS 107      | One AUL                            | Chromosome I                                                                    | 2 | 1 | 4 | 1 | 4 | 5 | 1 | 1 |
| <i>V. harveyi</i> QT520                | One AUL                            | Chromosome I                                                                    | 2 | 1 | 3 | 1 | 4 | 5 | 1 | 0 |
| <i>V. hyugaensis</i><br>090810a        | One AUL+<br>Two alginate<br>lyases | Chromosome I + one<br>alginate lyases +<br>Chromosome II one alginate<br>lyases | 8 | 1 | 4 | 1 | 2 | 3 | 2 | 0 |
| <i>V. jasicida</i> 090810c             | One AUL+ one<br>alginate lyases    | Chromosome I                                                                    | 6 | 1 | 4 | 1 | 4 | 5 | 1 | 0 |
| <i>V. mediterranei</i> 117-<br>T6      | One AUL                            | Chromosome II                                                                   | 3 | 1 | 4 | 1 | 3 | 3 | 0 | 3 |
| <i>V. neocaledonicus</i><br>CGJ02-2    | One AUL                            | Chromosome II                                                                   | 4 | 1 | 4 | 1 | 1 | 2 | 1 | 0 |
| <i>V. owensii</i> 1700302              | One AUL                            | Chromosome I                                                                    | 4 | 1 | 4 | 1 | 4 | 4 | 0 | 1 |
| <i>V. owensii</i> SH14                 | One AUL                            | Chromosome I                                                                    | 4 | 1 | 5 | 1 | 4 | 5 | 0 | 0 |
| <i>V. owensii</i> V180403              | One AUL+<br>Two alginate<br>lyases | Chromosome I + one<br>alginate lyases +<br>Chromosome II one alginate<br>lyases | 8 | 0 | 5 | 1 | 4 | 5 | 1 | 0 |



|                                   |                  |                  |   |   |   |   |   |   |   |   |
|-----------------------------------|------------------|------------------|---|---|---|---|---|---|---|---|
| <i>V. rumoiensis</i> FERM P-14531 | One AUL          | Chromosome II    | 3 | 0 | 4 | 1 | 2 | 3 | 1 | 0 |
| <i>Vibrio</i> sp. THAF190c        | Scattered system | Chromosome I, II | 5 | 1 | 6 | 2 | 2 | 2 | 1 | 0 |
| <i>V. splendidus</i> BST398       | One AUL          | Chromosome I     | 5 | 2 | 5 | 1 | 4 | 4 | 1 | 2 |

**Table S10** The enzymatic characteristics of 91 previously studied alginate lyases from families PL6, -7, -14, -17.

See Supplementary\_material\_Table S10.

**Table S11** LC-MS/MS-30 min sequencing for the coarse band of the crude vesicles cultured with alginate as sole carbon source (Fig. S11).

See Supplementary\_material\_Table S11.
